# Supplementary material for: Facile bubble-assisted evaporation-induced assembly of high-density arrays of Co3O4 nano/microlotus leaves: fluorescent properties, drug delivery, and biocompatibility
Source: Royal Society of Chemistry journal article supplement (doi:10.1039/c3ce42149j), 2013-12-06
Supplement: c3ce42149j.pdf [file c3ce42149j.pdf]

## Supporting Information

for

### **Facile bubble-assisted evaporation-induced assembly of high-density arrays of Co<sub>3</sub>O<sub>4</sub> nano/microlotus leaves: fluorescent properties, drug delivery, and biocompatibility**

**Guo-Xiu Tong,<sup>\*,†</sup> Fang-Ting Liu,<sup>†</sup> Wen-Hua Wu,<sup>†</sup> Chao-Li Tong,<sup>†</sup> Ru Qiao,<sup>†</sup> Hui-Chen Guo<sup>\*,†</sup>**

*Received (in XXX, XXX) Xth XXXXXXXXXX 20XX, Accepted Xth XXXXXXXXXX 20XX*  
DOI: 10.1039/b000000x

<sup>†</sup>College of Chemistry and Life Science, Zhejiang Normal University, Jinhua 321004, China.

[\*] Prof. Dr. G. X. Tong

College of Chemistry and Life Sciences, Zhejiang Normal University,

No.688, Yingbin Road, Jinhua 321004 P. R. China

Phone: 86-579-82282269; Fax: 86-579-82282269

E-mail: [tonggx@zjnu.cn](mailto:tonggx@zjnu.cn)

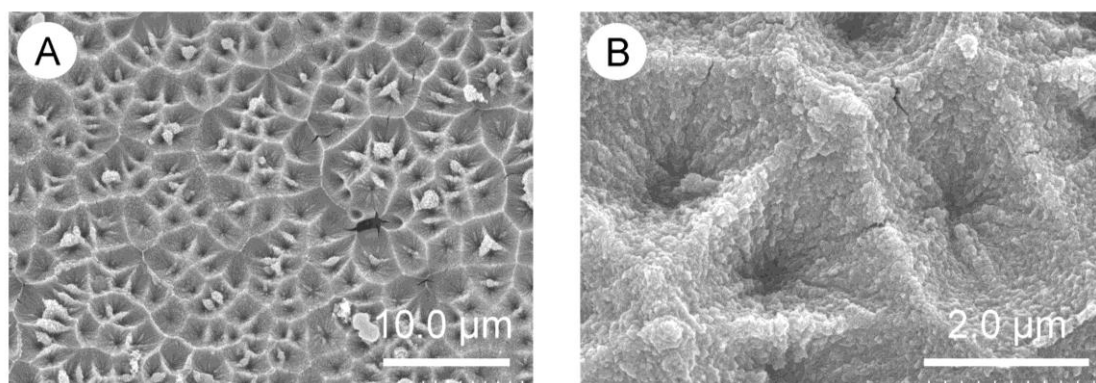

**Figure S1.** SEM image of the  $\text{Co}_3\text{O}_4$  microlotus leaf arrays formed for 6h.

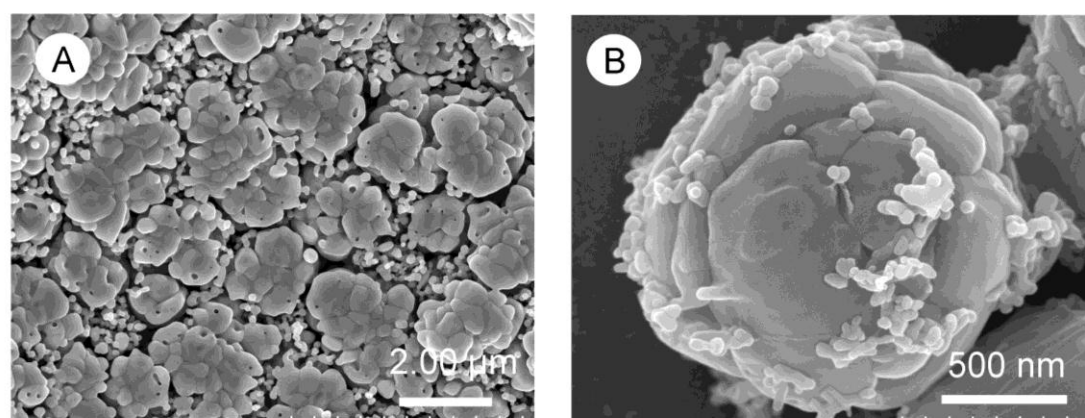

**Figure S2.** Low- and high-resolution SEM images of  $\text{Co}_3\text{O}_4$  microspheres produced at 700 °C.

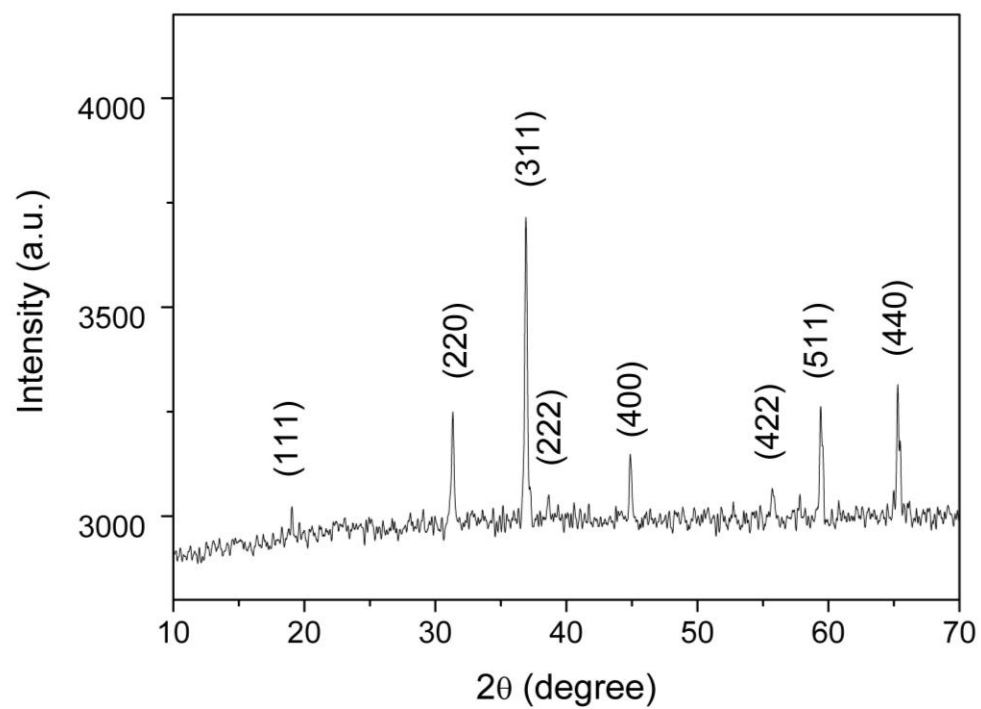

**Figure S3.** XED pattern of  $\text{Co}_3\text{O}_4$  microspheres produced at 700 °C.
